# Supplementary material for: Comparison of Gut Microbial Community between Bt-Resistant and Susceptible Strains of Ostrinia furnacalis
Source: MDPI journal article supplement (doi:10.3390/agronomy13071923), 2023-07-20
Supplement: s1 [file s1]

## Supporting Information

Figure S1: Bacterial growth by inoculating the homogenates of *Ostrinia furnacalis* larvae in TSA plate.

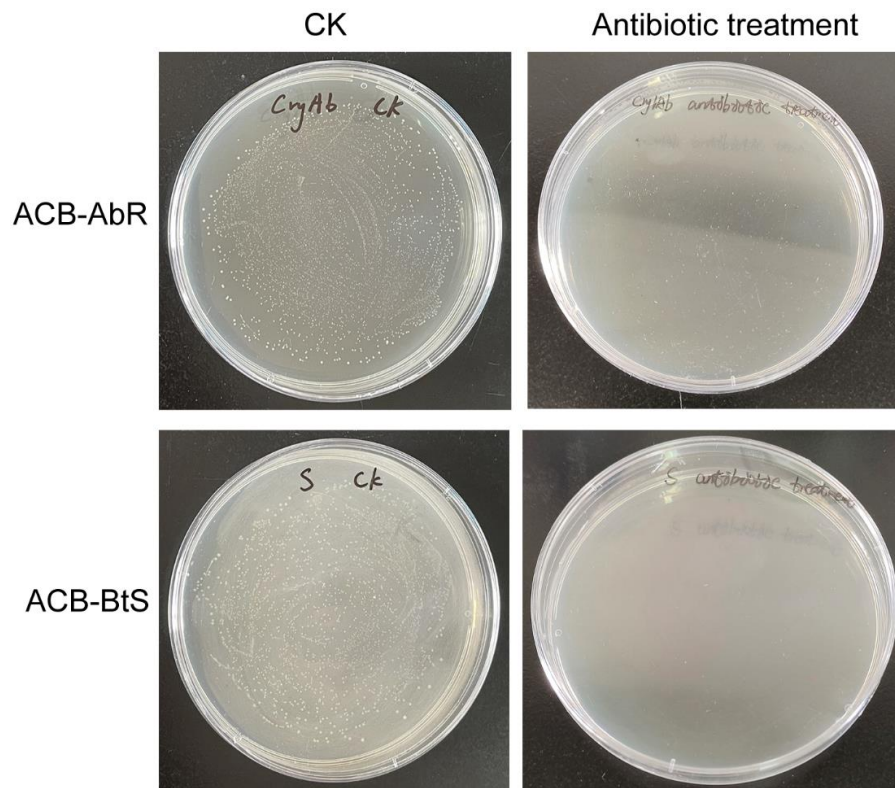

Figure S1. Bacterial growth by inoculating the homogenates of *Ostrinia furnacalis* larvae in TSA plate.
